# Supplementary material for: Non-Structural Protein-W61 as a Novel Target in Severe Fever with Thrombocytopenia Syndrome Virus (SFTSV): An In-Vitro and In-Silico Study on Protein-Protein Interactions with Nucleoprotein and Viral Replication
Source: MDPI journal article supplement (doi:10.3390/v15091963), 2023-09-20
Supplement: s1 [file s1]

## Supplementary information

### Non-Structural Protein-W61 as a Novel Target in Severe Fever with Thrombocytopenia Syndrome Virus (SFTSV): An In-Vitro and In-Silico Study on Protein-Protein Interactions with Nucleoprotein and Viral Replication

**Supplementary Table S1. Bacterial strains and plasmids use in this study**

| Strains/plasmid         | Description                                                                                                                                      | References |
|-------------------------|--------------------------------------------------------------------------------------------------------------------------------------------------|------------|
| <i>Escherichia coli</i> |                                                                                                                                                  |            |
| DH5α                    | F <sup>-endA1</sup> , glnV44, thi-1, recA1, relA1, gyrA96, deoR, nupG, Φ80dlacZΔM15 Δ(lacZYA-argF)U169, hsdR17(rK-mK <sup>+</sup> ),             | Lab stock  |
| BL21(DE3)pLysS          | F <sup>-</sup> , ompT, hsdS <sub>B</sub> (r <sub>B</sub> <sup>-</sup> , m <sub>B</sub> <sup>-</sup> ), dcm, gal, λ (DE3), pLysS, Cm <sup>r</sup> | Lab stock  |
| JOL2643                 | DH5α containing pcDNA3.1-NP                                                                                                                      | This study |
| JOL2644                 | DH5α containing pcDNA3.1-NSs                                                                                                                     |            |
| JOL2645                 | DH5α containing pcDNA3.1-NSsC5S                                                                                                                  |            |
| JOL2646                 | DH5α containing pcDNA3.1-NSsW61Y                                                                                                                 |            |
| JOL2647                 | DH5α containing pcDNA3.1-NSsS207T                                                                                                                |            |
| <b>Plasmids</b>         |                                                                                                                                                  |            |
| pcDNA3.1-CMV            | CMV promoter, MCS, f1 ori, SV40 promoter, Neomycin <sup>R</sup> pUC ori, Amp <sup>R</sup>                                                        | Lab stock  |
| pcDNA3.1-NP             | pcDNA3.1 harboring NP of SFTSV                                                                                                                   | This study |
| pcDNA3.1-NSs            | pcDNA3.1 harboring NSs of SFTSV                                                                                                                  |            |
| pcDNA3.1-NSsC5S         | pcDNA3.1 harboring NSC5S mutant of NSs                                                                                                           |            |
| pcDNA3.1- NSsW61Y       | pcDNA3.1 harboring NSW61Y mutant of NSs                                                                                                          |            |
| pcDNA3.1- NSsS207T      | pcDNA3.1 harboring NSS207T mutant of NSs                                                                                                         |            |
| pET28a(+)               | IPTG-inducible, T7 expression vector, C-terminal 6× histidine tag, Kan <sup>R</sup>                                                              | Lab stock  |
| pET28a-NP               | pET28a(+)harboring NP optimized genes                                                                                                            | This study |
| pET28a-NSs              | pET28a(+)harboring NSs genes                                                                                                                     | This study |
| pET28a-NSsW61Y          | pET28a(+)harboring NSs W61Y genes                                                                                                                | This study |

**Supplementary Table S2. Primers use in this study**

| primers                          | Description (5' - 3')                                | References                                                          |
|----------------------------------|------------------------------------------------------|---------------------------------------------------------------------|
| pcDNA3.1-NP-F                    | CCCAAGCTTGCCACCATGGCAGAGT                            |                                                                     |
| pcDNA3.1-NP-R                    | CGGAATTCTTACAGGTTTCTGTAAGCAGCA                       |                                                                     |
| pcDNA3.1- NSs-F                  | CCCAAGCTTATGTCGCTGAGCAA                              |                                                                     |
| pcDNA3.1-NSs-R                   | CGAAGCTTTTAGACCTCCTTCG                               | This study                                                          |
| pET28-NSs-F                      | CGGAATTCATGTCGCTGAGCAAATGCT                          |                                                                     |
| pET28-NSs-R                      | GGGAAGCTTGTGGTGGTGGTGG                               |                                                                     |
| pET28-NP-F                       | CGGAATTCATGTCCGAGTGGAGC                              |                                                                     |
| pET28-NP-R                       | GGGAAGCTTCAGGTTCCGGTAAG                              |                                                                     |
| Sseg-F-3                         | GGGTCCCTGAAGGAGTTGTAAA                               | Y. Sun et al.<br>Journal of Clinical<br>Virology 53<br>(2012) 48–53 |
| Sseg-R-3                         | TGCCTTCACCAAGACTATCAATGT                             |                                                                     |
| <i>Site-directed mutagenesis</i> |                                                      |                                                                     |
| NSst16a-F                        | ATGTCGCTGAGCAAAAGCTCCAACGTTGACCTCA<br>AATC           | This study                                                          |
| NSst16a-R                        | GATTTGAGGTCAACGTTGGAGCTTTTGCTCAGCGA<br>CA            |                                                                     |
| NSsg182a-g183t-F                 | GGATTTTTTGGGTTGCCAAATAAATATACTGTGTTG<br>GTCATCTTGCCC |                                                                     |
| NSsg182a-g183t-R                 | GGGCAAGATGACCAACACAGTATATTTATTTGGCA<br>ACCCAAAAAATCC |                                                                     |
| NSst619a-F                       | CTTGAACCACCACTTATTCATTCTACCTCATTGCG<br>TAAG          |                                                                     |
| NSst619a-R                       | CTTACGCAATGAGGTAGAAGTGAATAAGTGGTGGT<br>TCAAG         |                                                                     |

**Supplementary Table S3.** Pairwise comparison of nucleotide sequence alignment of complementary sequences within S segment of completely sequenced twelve Korean SFTSV isolates belonging to different genotypes. The lower comparison gradient indicated the percentage identity between two strains. Pairwise comparison was performed using CLC genomics workbench 22 software.

| S segment | 1     | 2     | 3     | 4     | 5     | 6     | 7     | 8     | 9     | 10    | 11    | 12 |
|-----------|-------|-------|-------|-------|-------|-------|-------|-------|-------|-------|-------|----|
| CB2       |       |       |       |       |       |       |       |       |       |       |       |    |
| CB1       | 95.30 |       |       |       |       |       |       |       |       |       |       |    |
| CB3       | 95.02 | 96.45 |       |       |       |       |       |       |       |       |       |    |
| KADGH     | 96.11 | 96.11 | 96.05 |       |       |       |       |       |       |       |       |    |
| KAGNH     | 95.82 | 95.93 | 96.22 | 96.02 |       |       |       |       |       |       |       |    |
| KAGWH3    | 95.76 | 96.16 | 95.88 | 96.68 | 97.37 |       |       |       |       |       |       |    |
| KAGNH4    | 96.33 | 96.56 | 96.51 | 97.37 | 97.94 | 98.28 |       |       |       |       |       |    |
| KAJNH2    | 95.36 | 95.59 | 95.53 | 97.77 | 95.88 | 96.28 | 96.79 |       |       |       |       |    |
| KAGBH5    | 95.70 | 96.11 | 95.93 | 96.74 | 97.54 | 99.03 | 98.45 | 96.51 |       |       |       |    |
| KAGBH6    | 95.70 | 96.33 | 95.59 | 96.39 | 97.31 | 98.22 | 98.00 | 95.99 | 98.17 |       |       |    |
| KACNH3    | 95.07 | 96.74 | 98.00 | 96.39 | 96.22 | 95.99 | 96.68 | 95.76 | 96.05 | 95.82 |       |    |
| KASJH     | 95.99 | 94.96 | 94.79 | 95.48 | 95.48 | 95.76 | 96.33 | 94.79 | 95.88 | 95.65 | 94.79 |    |

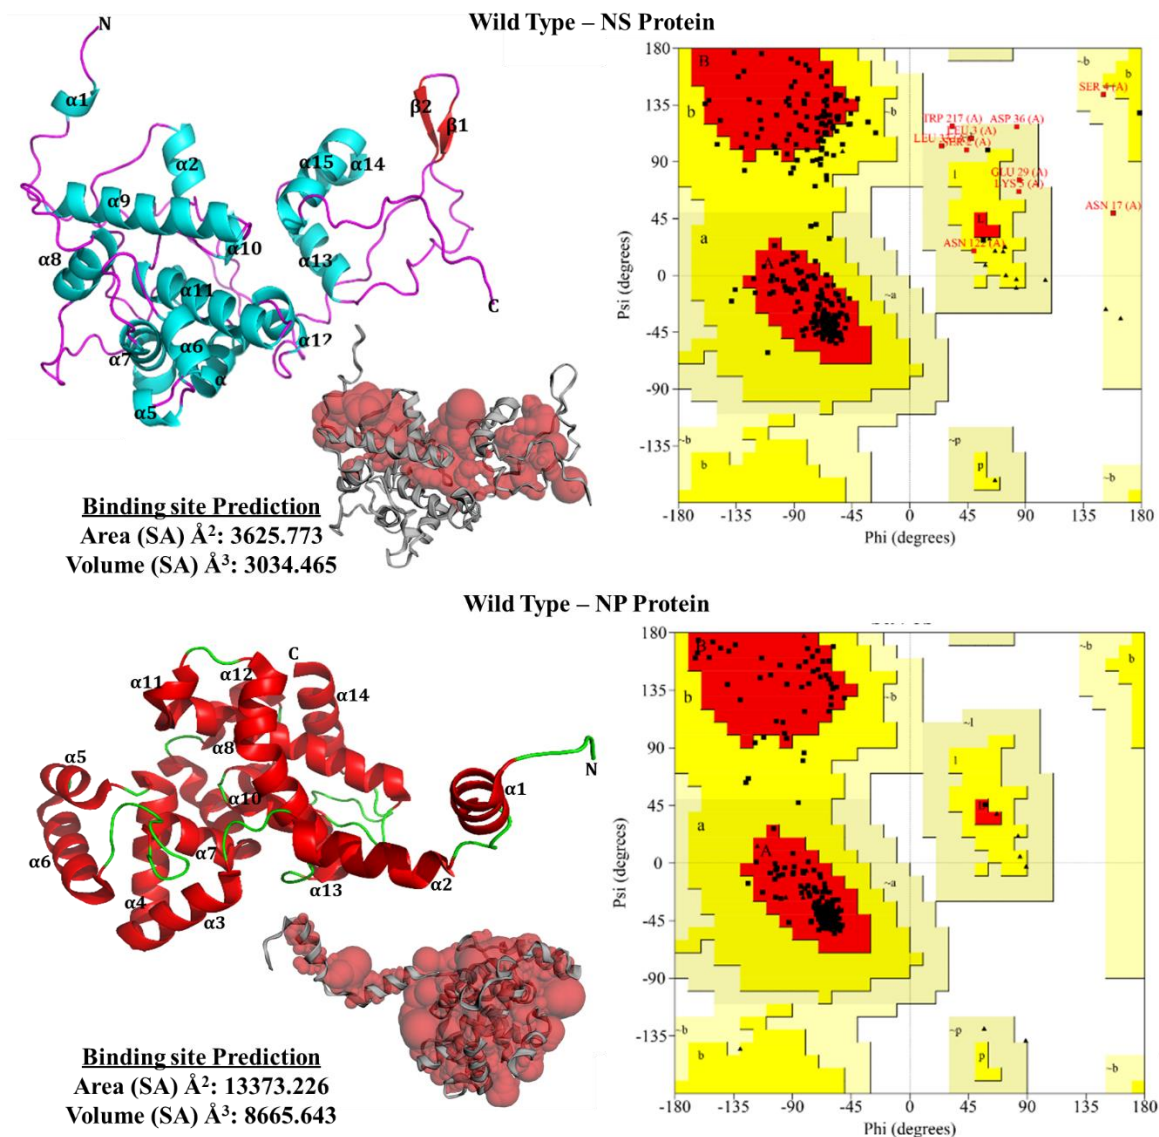

**Supplementary Figure S1. Prediction of the 3D structure and Ramachandran plot analysis of the NSs and NP protein.** The 3D structure of NSs and NP protein was modelled using AlphaFold and performed quality verification using the PROCHECK program. Ramachandran Plot analysis of the refined model of the NSs and NP proteins showing the number of residues located in a favourable region.

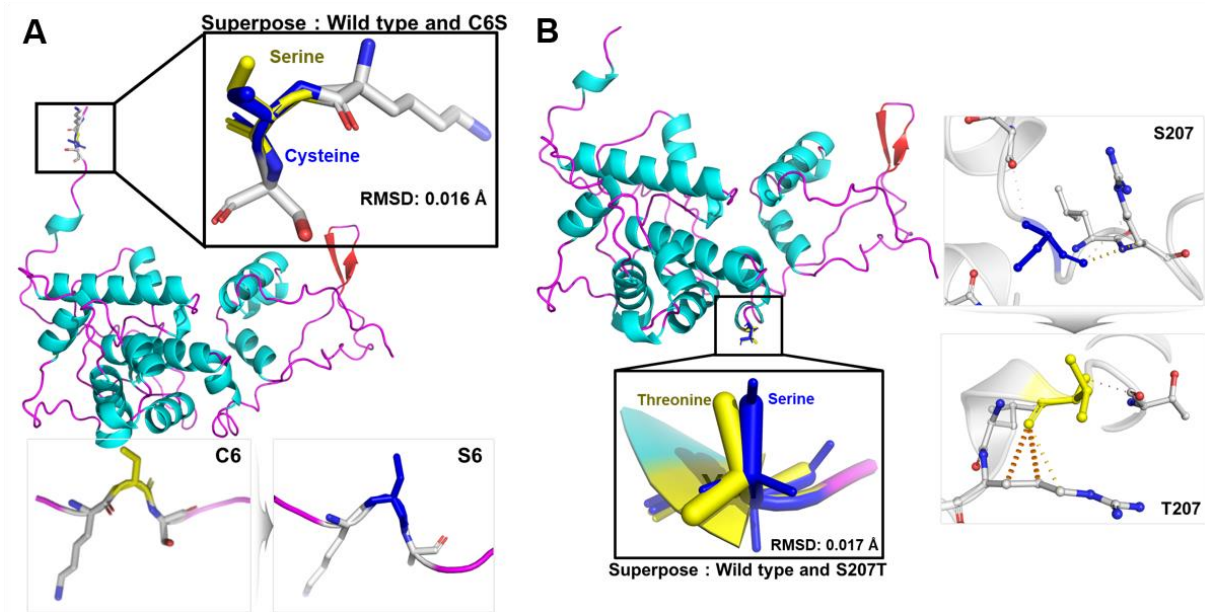

**Supplementary Figure S2. Prediction of the NSs mutants docking structure (A) Molecular docking of NSsC6S with NP and (B) Molecular docking of NSsS207T with NP.**

**Supplementary Figure S3. Alignment of Consensus Sequences of the S segments from SFTSV strains**

**Supplementary Figure S4. Alignment of Consensus Sequences of the M segments from SFTSV strains**
