# Supplementary figures and images for: Non-Structural Protein-W61 as a Novel Target in Severe Fever with Thrombocytopenia Syndrome Virus (SFTSV): An In-Vitro and In-Silico Study on Protein-Protein Interactions with Nucleoprotein and Viral Replication
Source: MDPI journal article supplement (doi:10.3390/v15091963), 2023-09-20

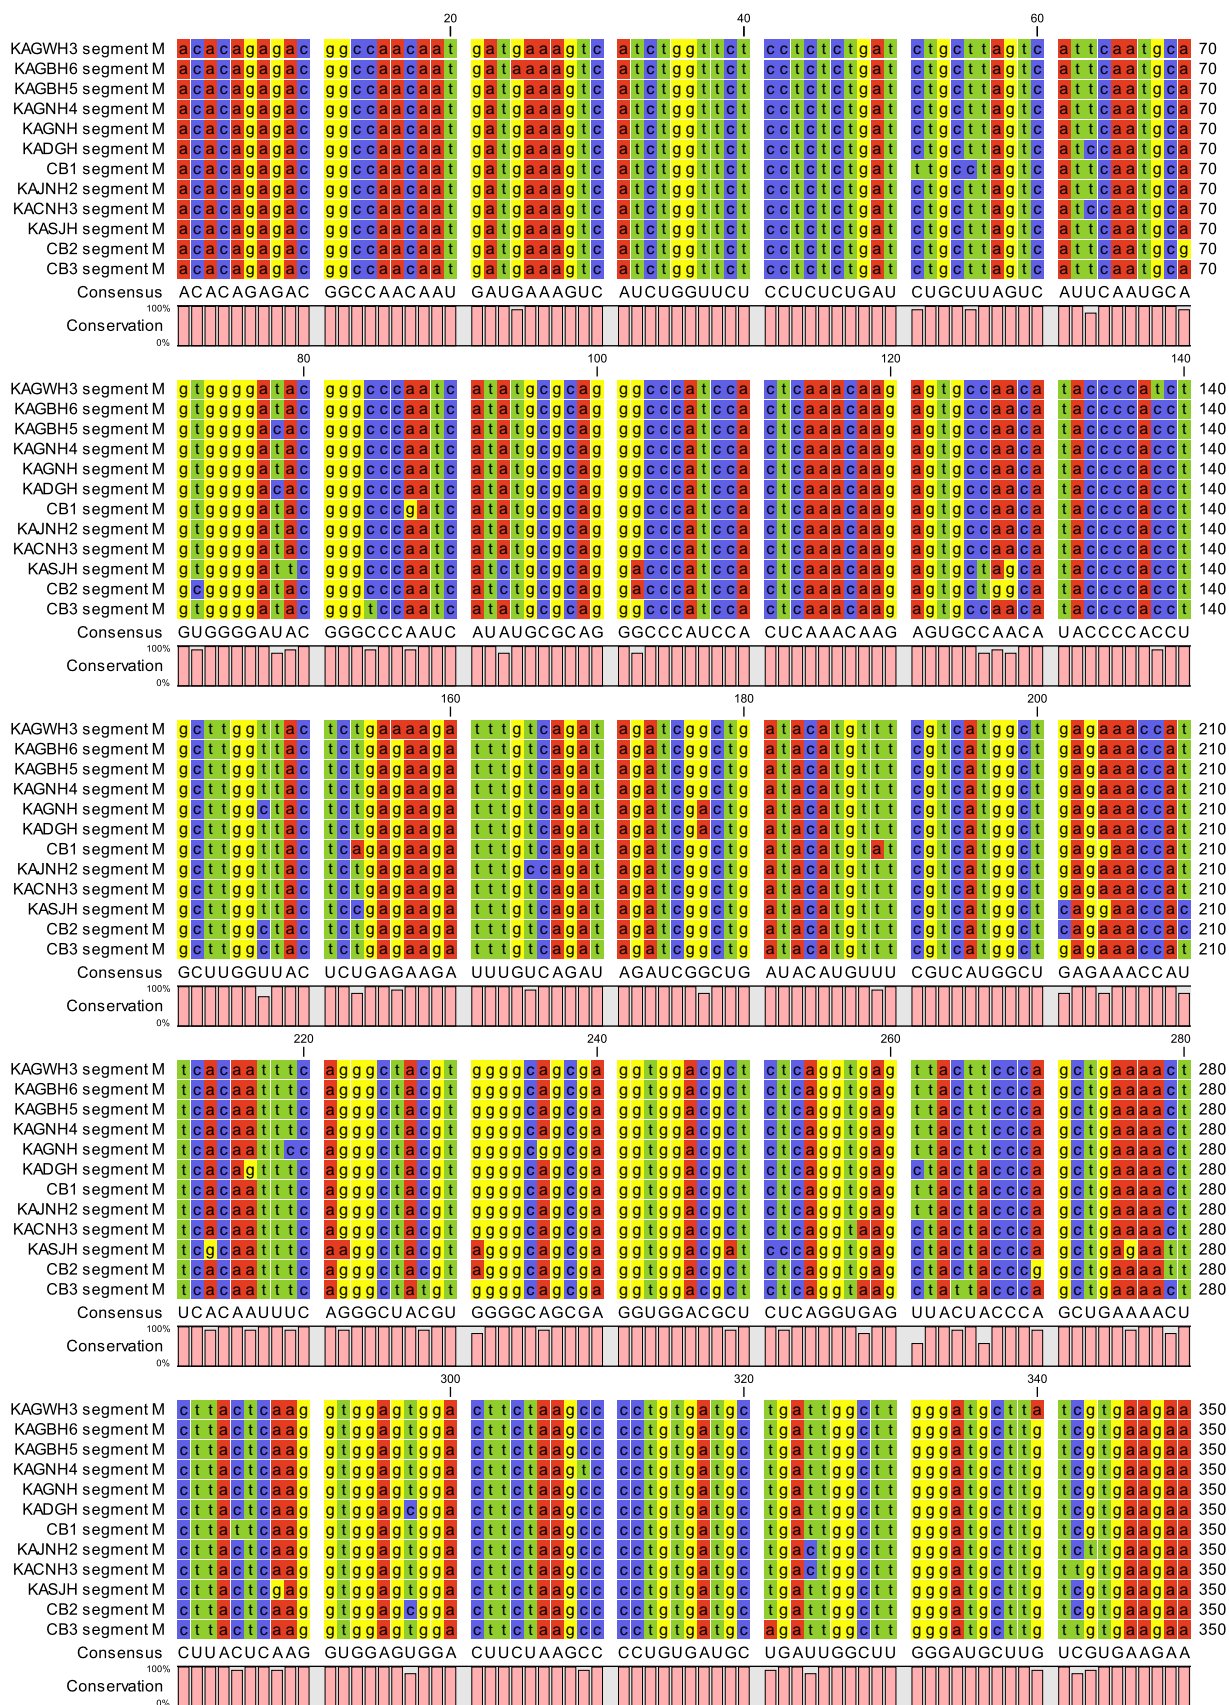

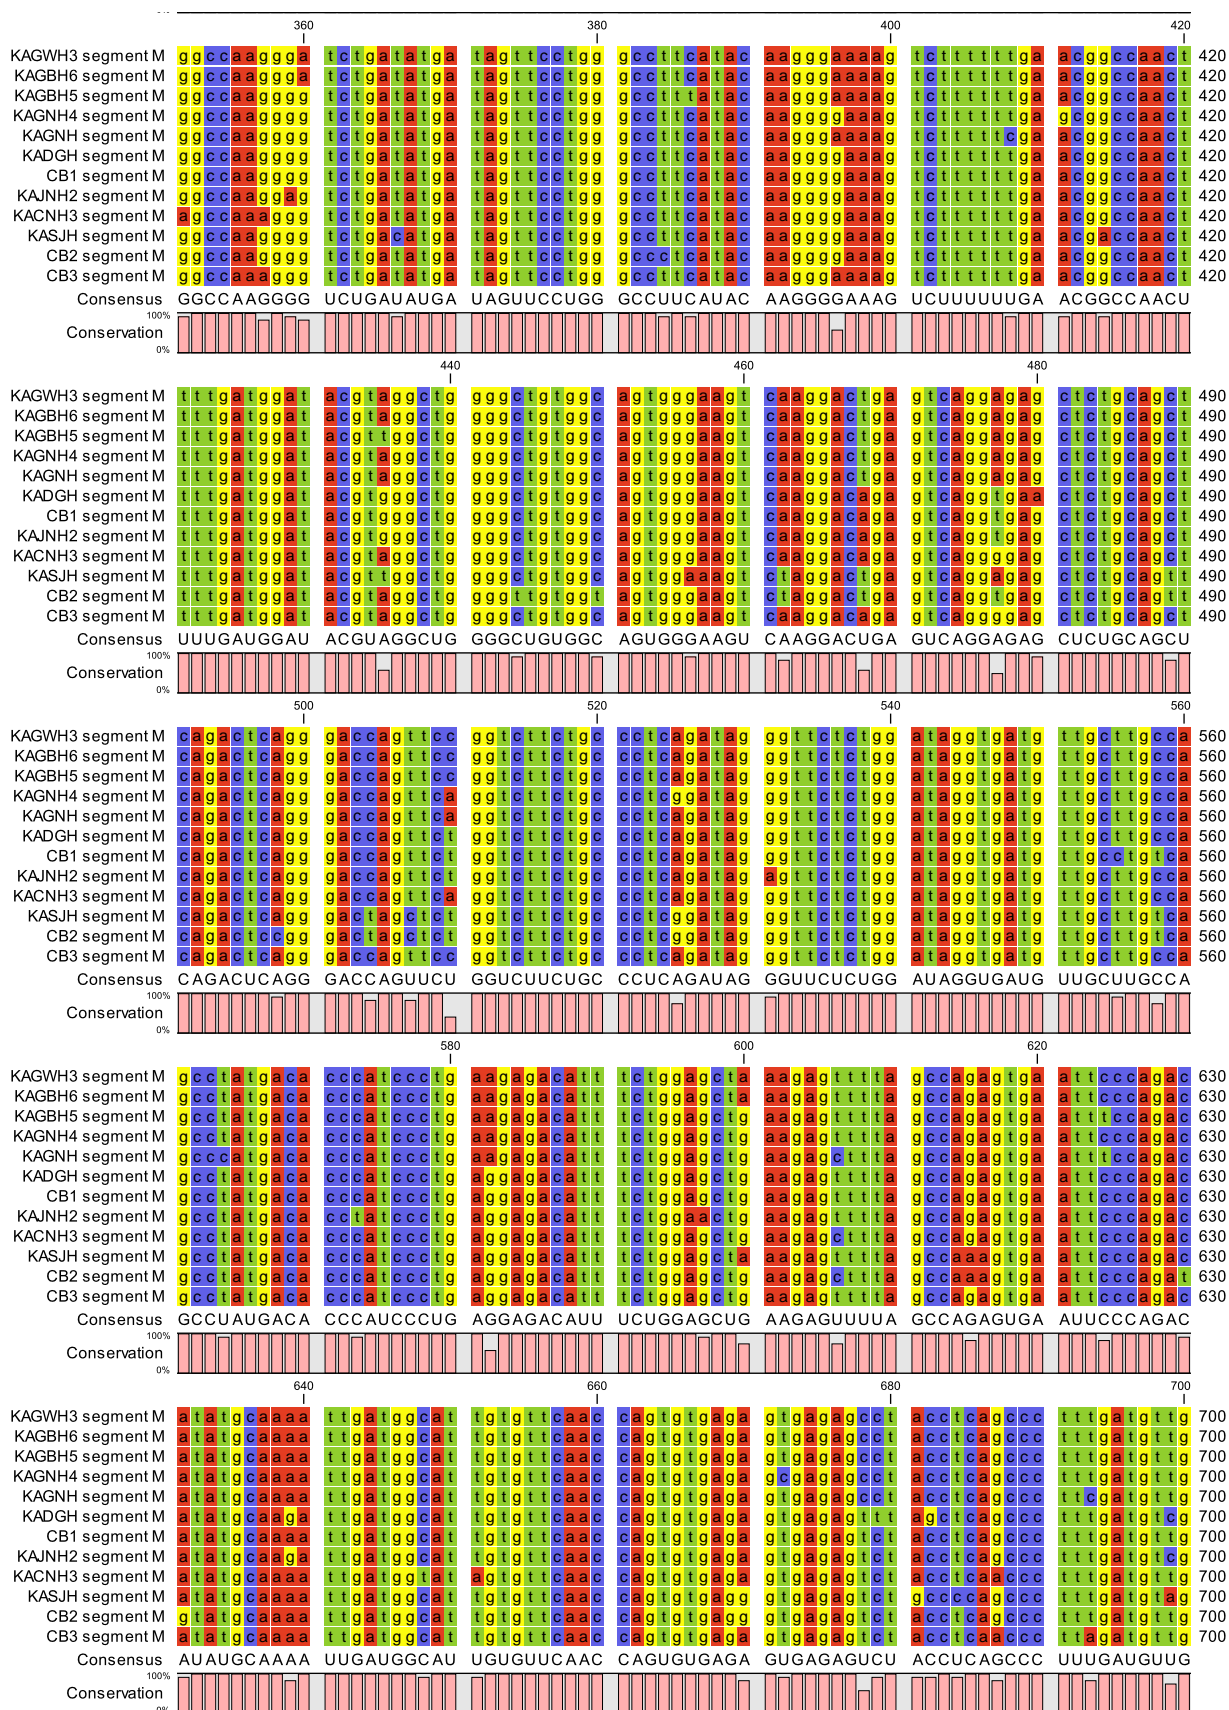

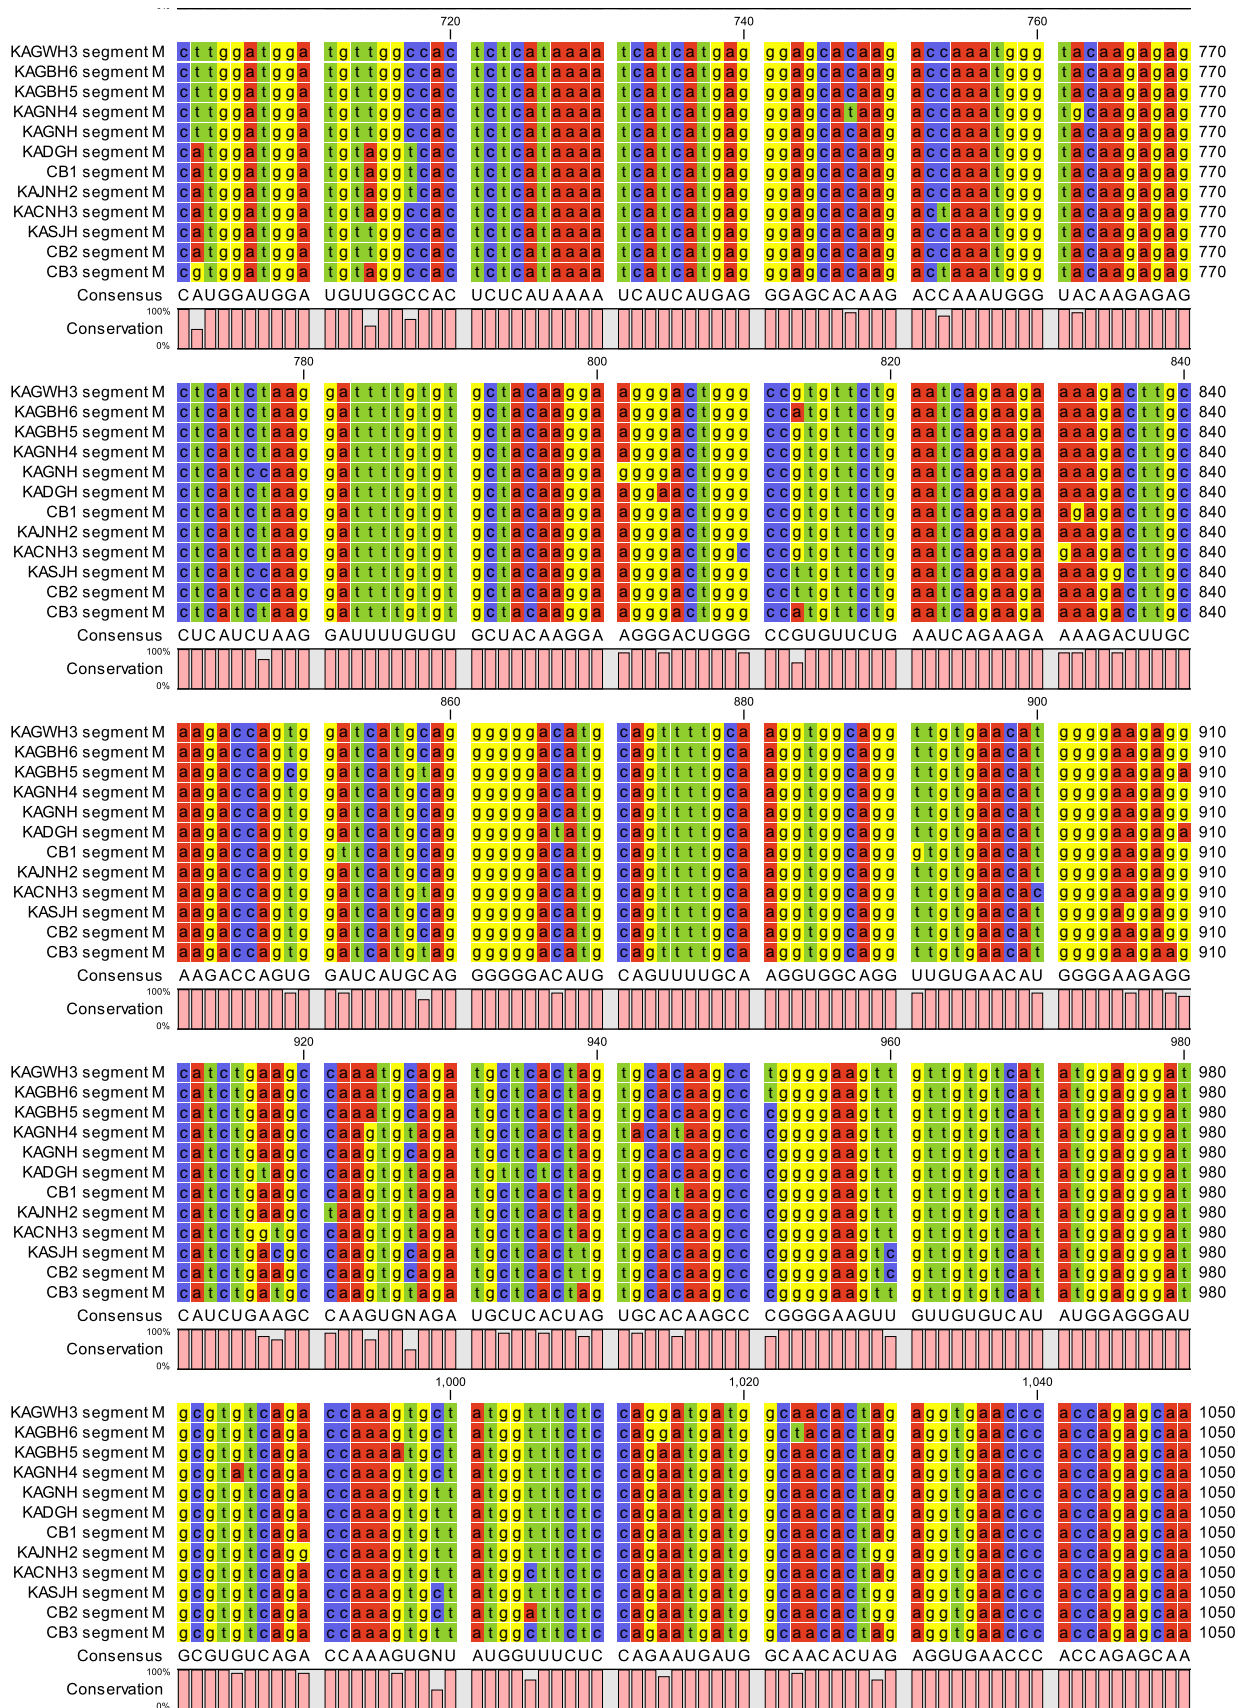

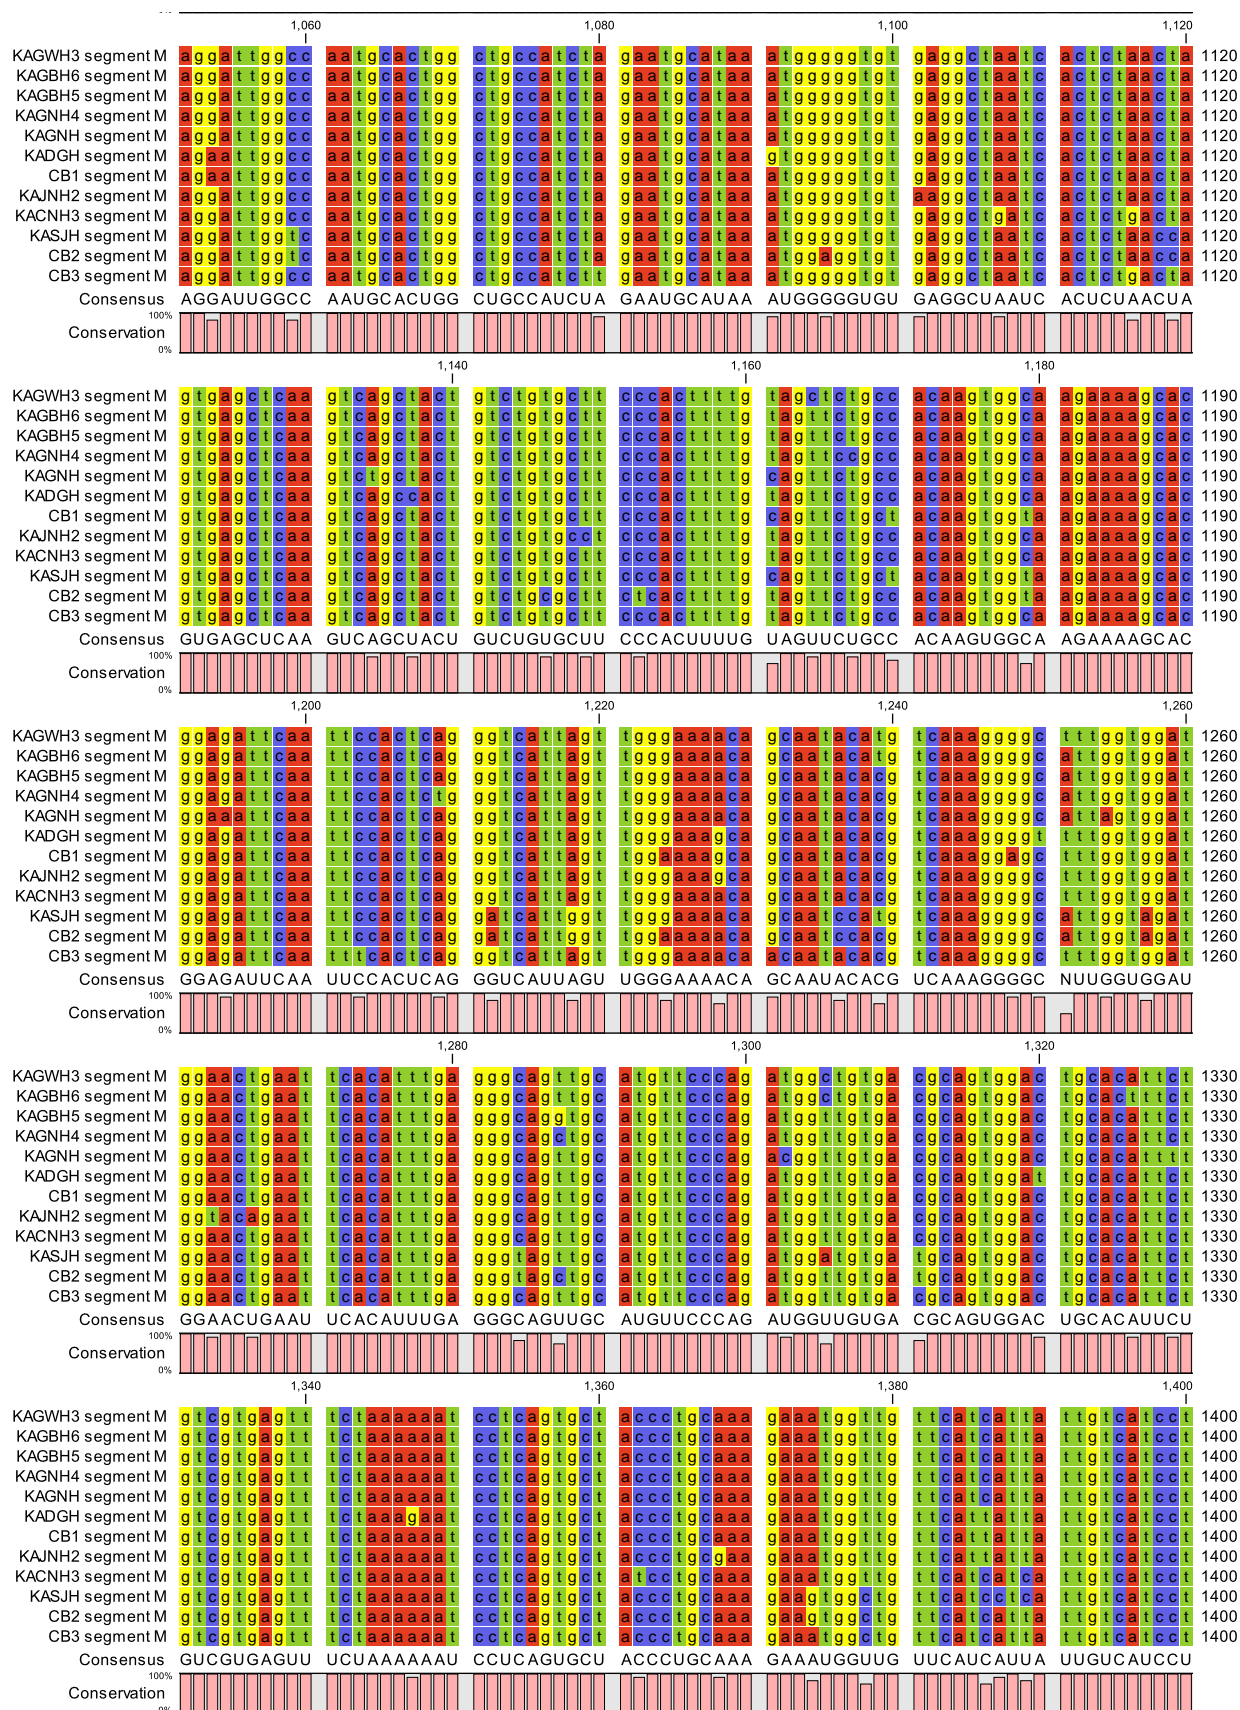

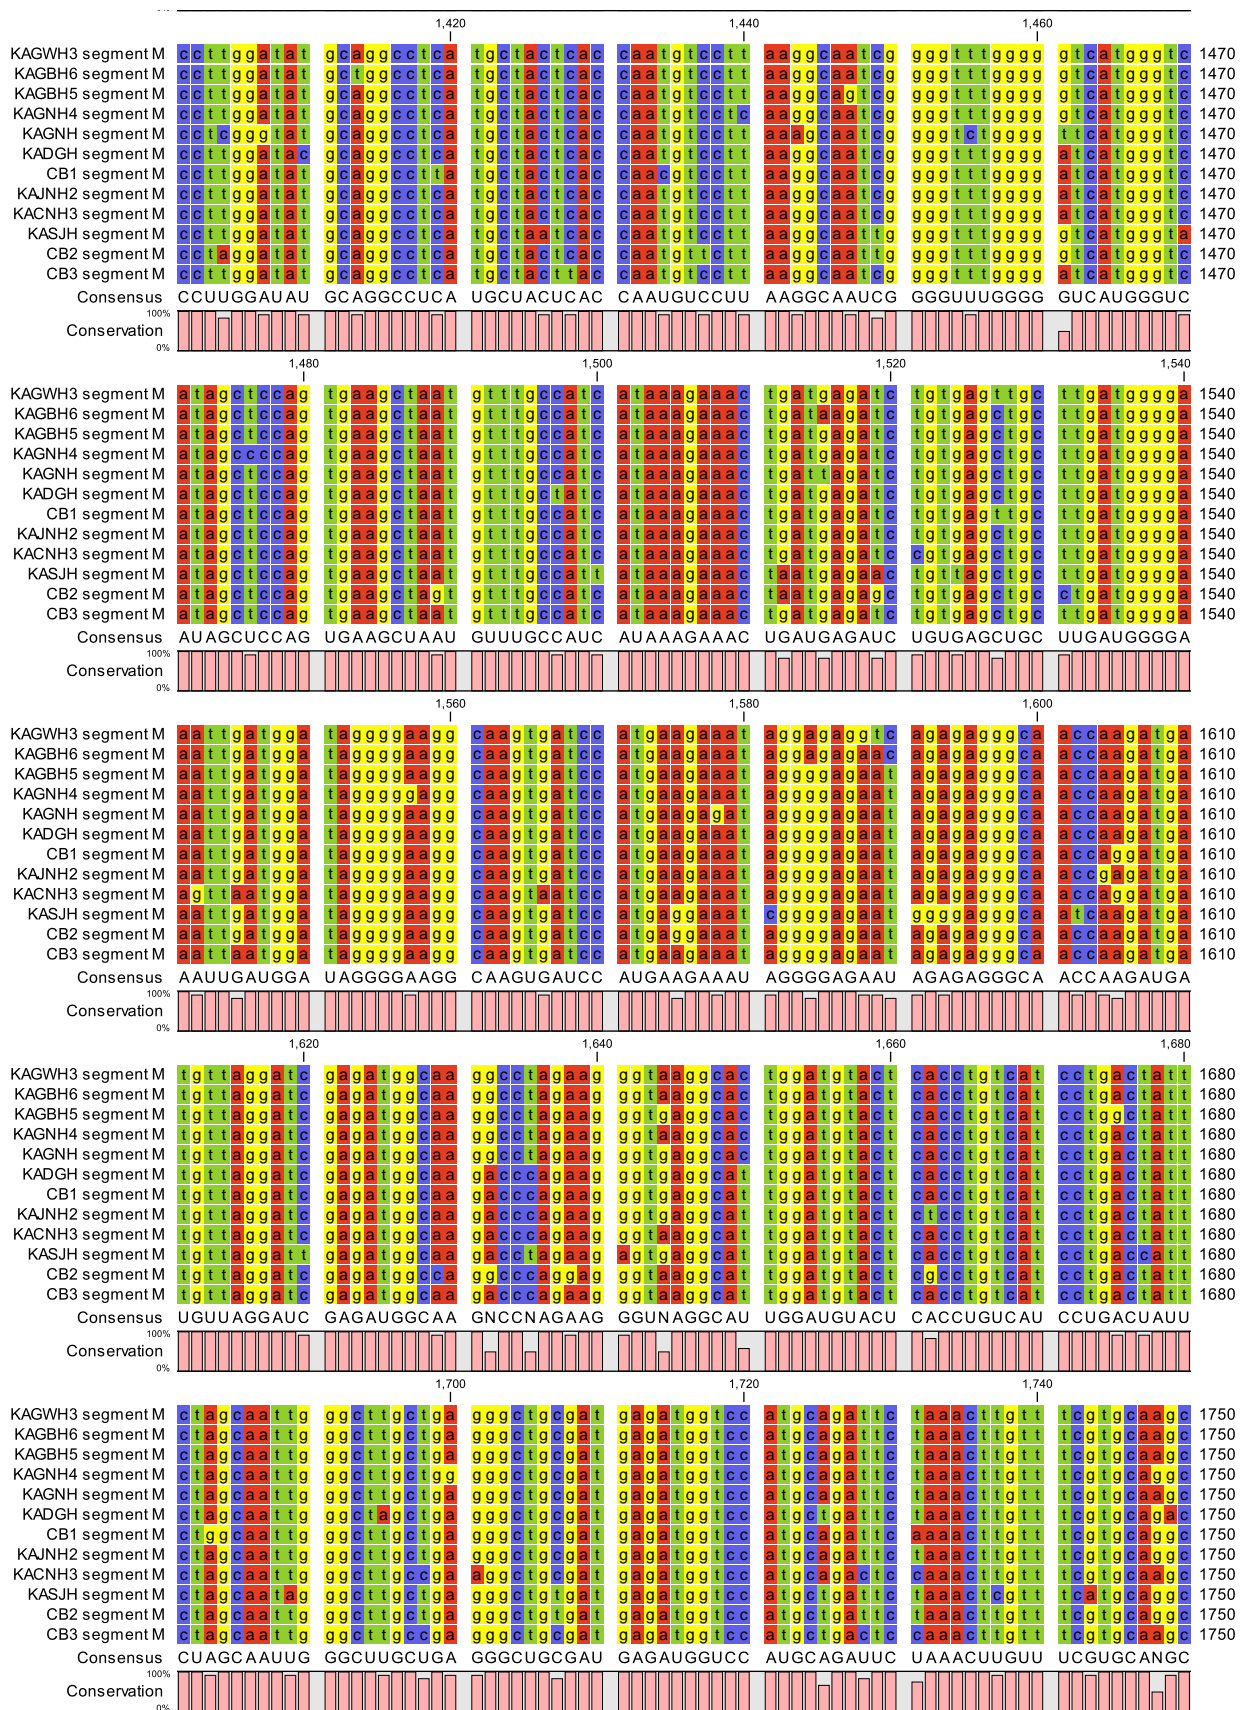

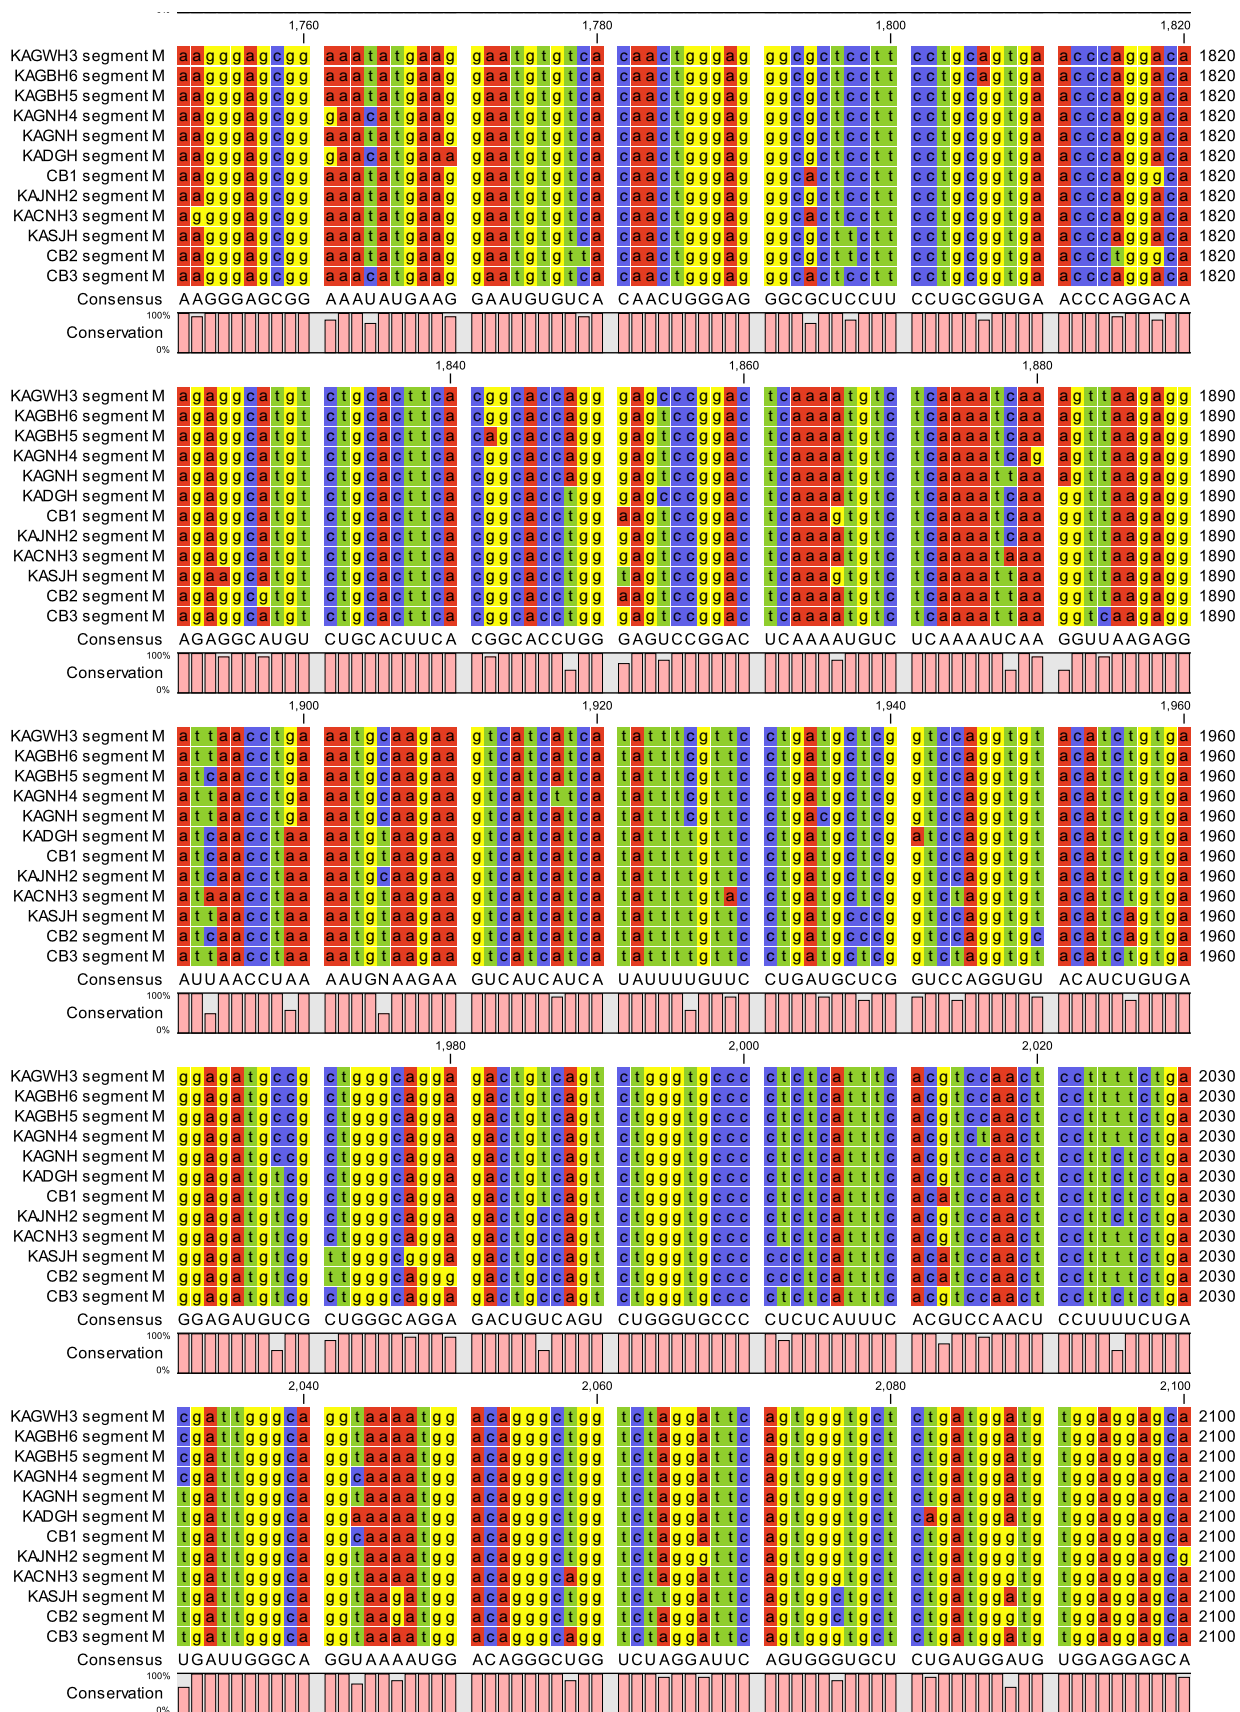



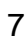

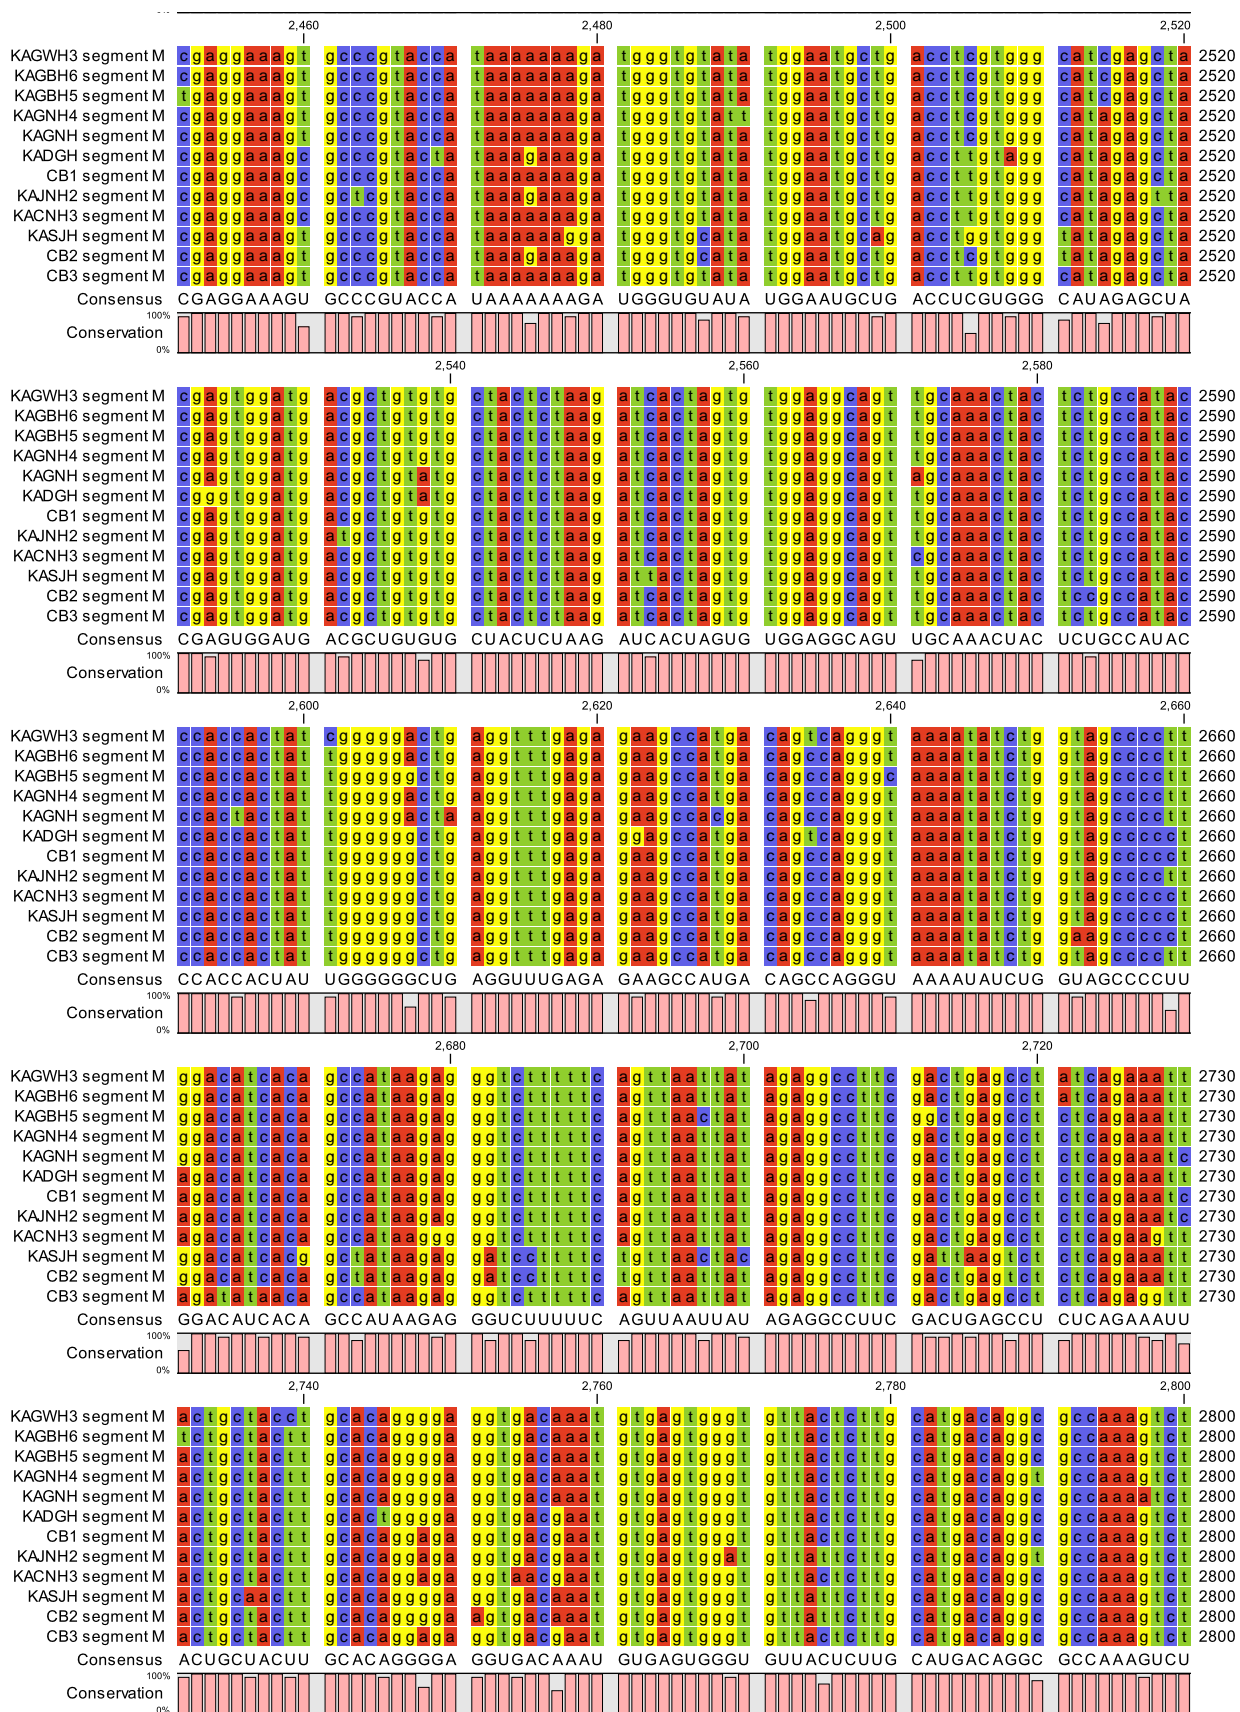



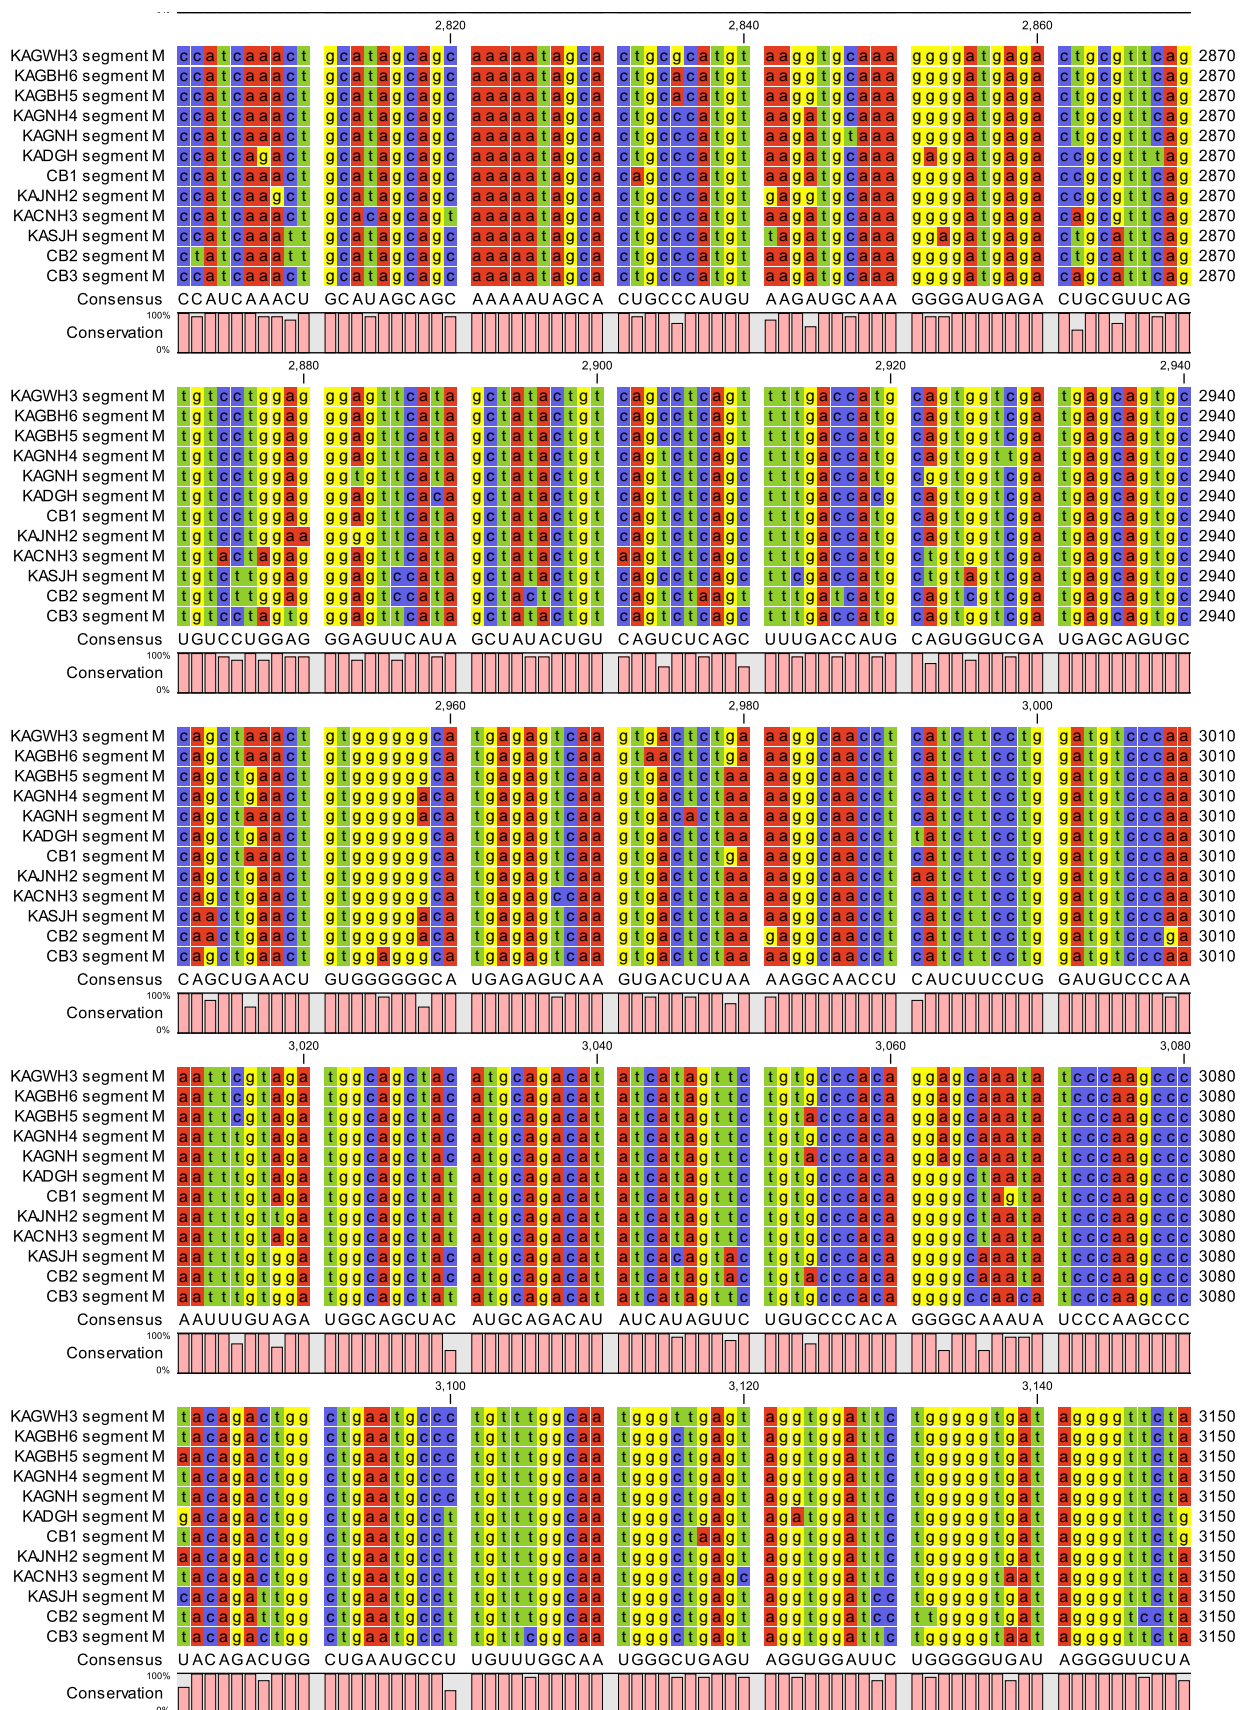

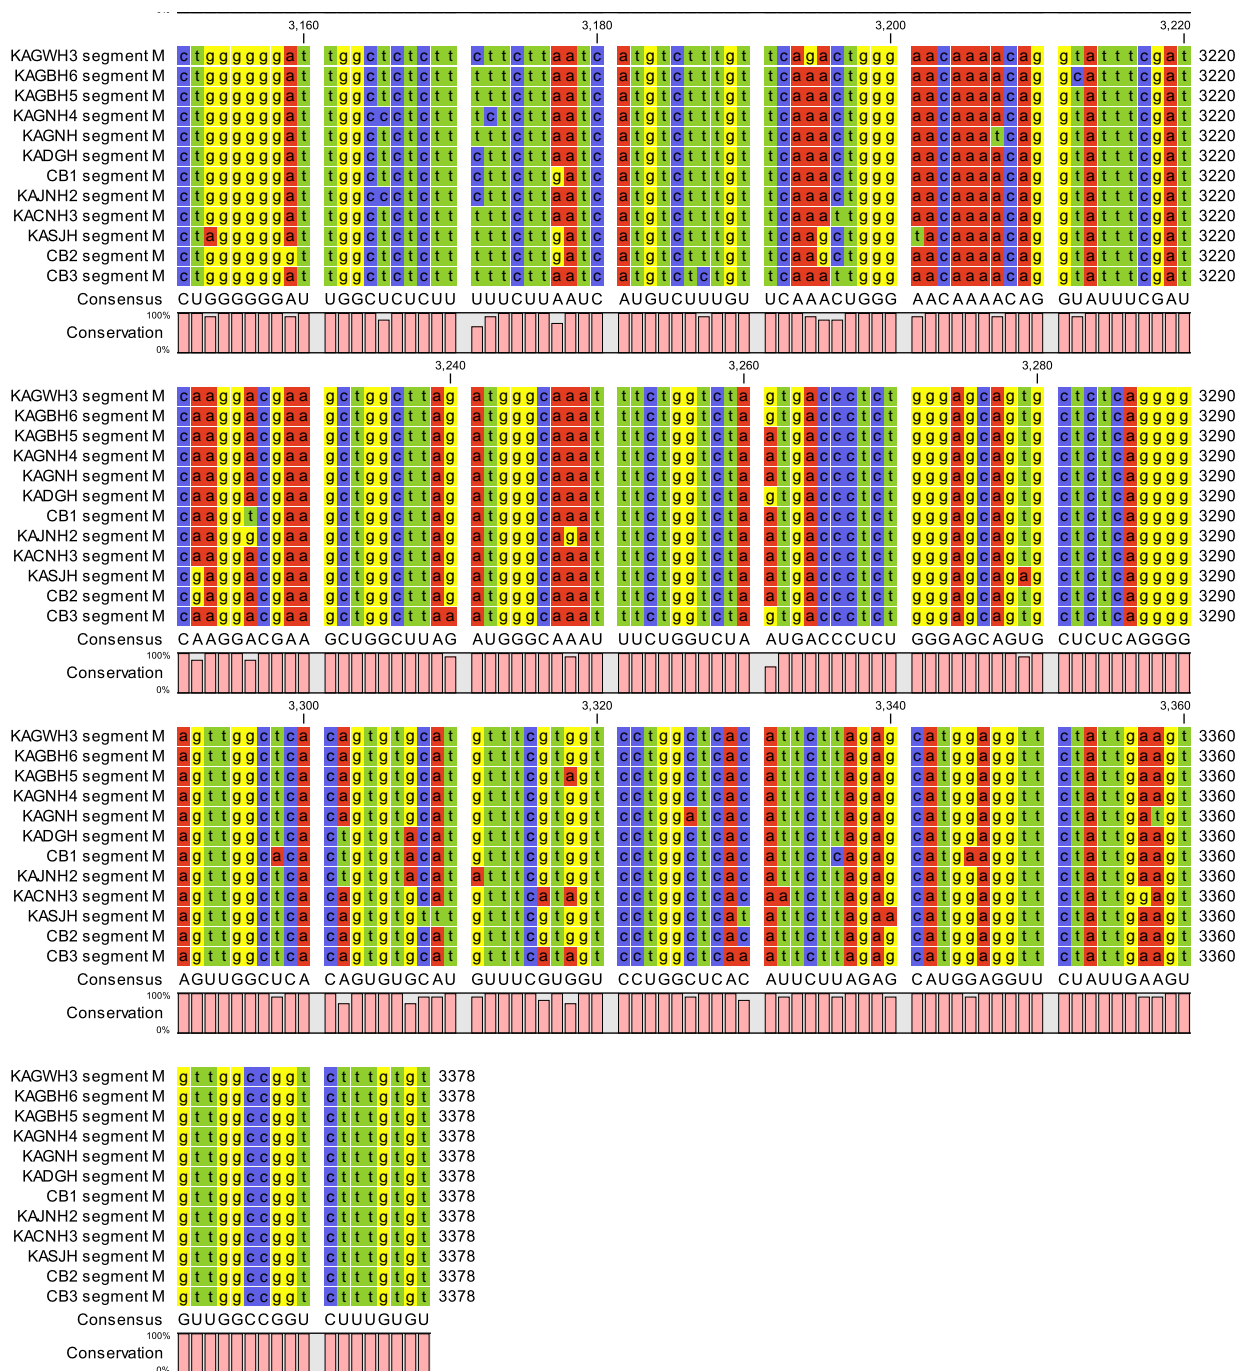

Supplement: s1 [file s1]

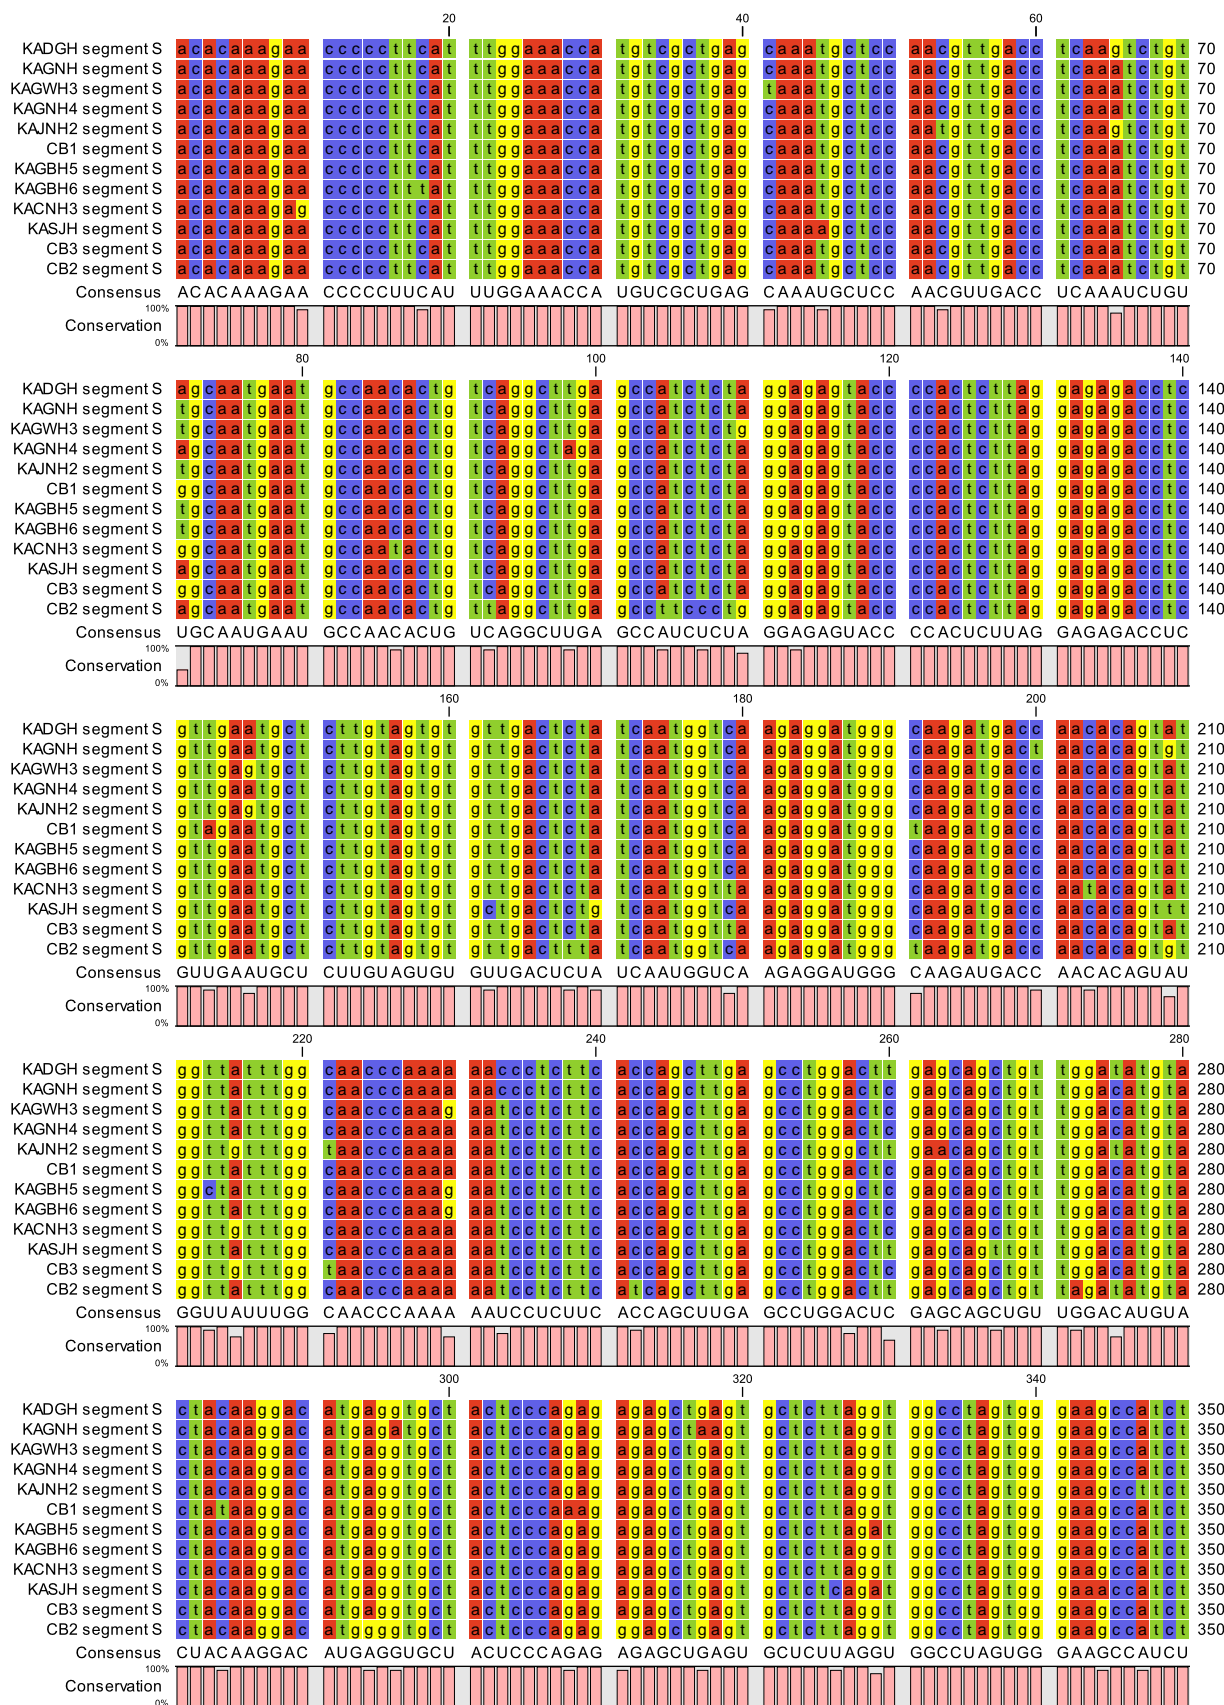

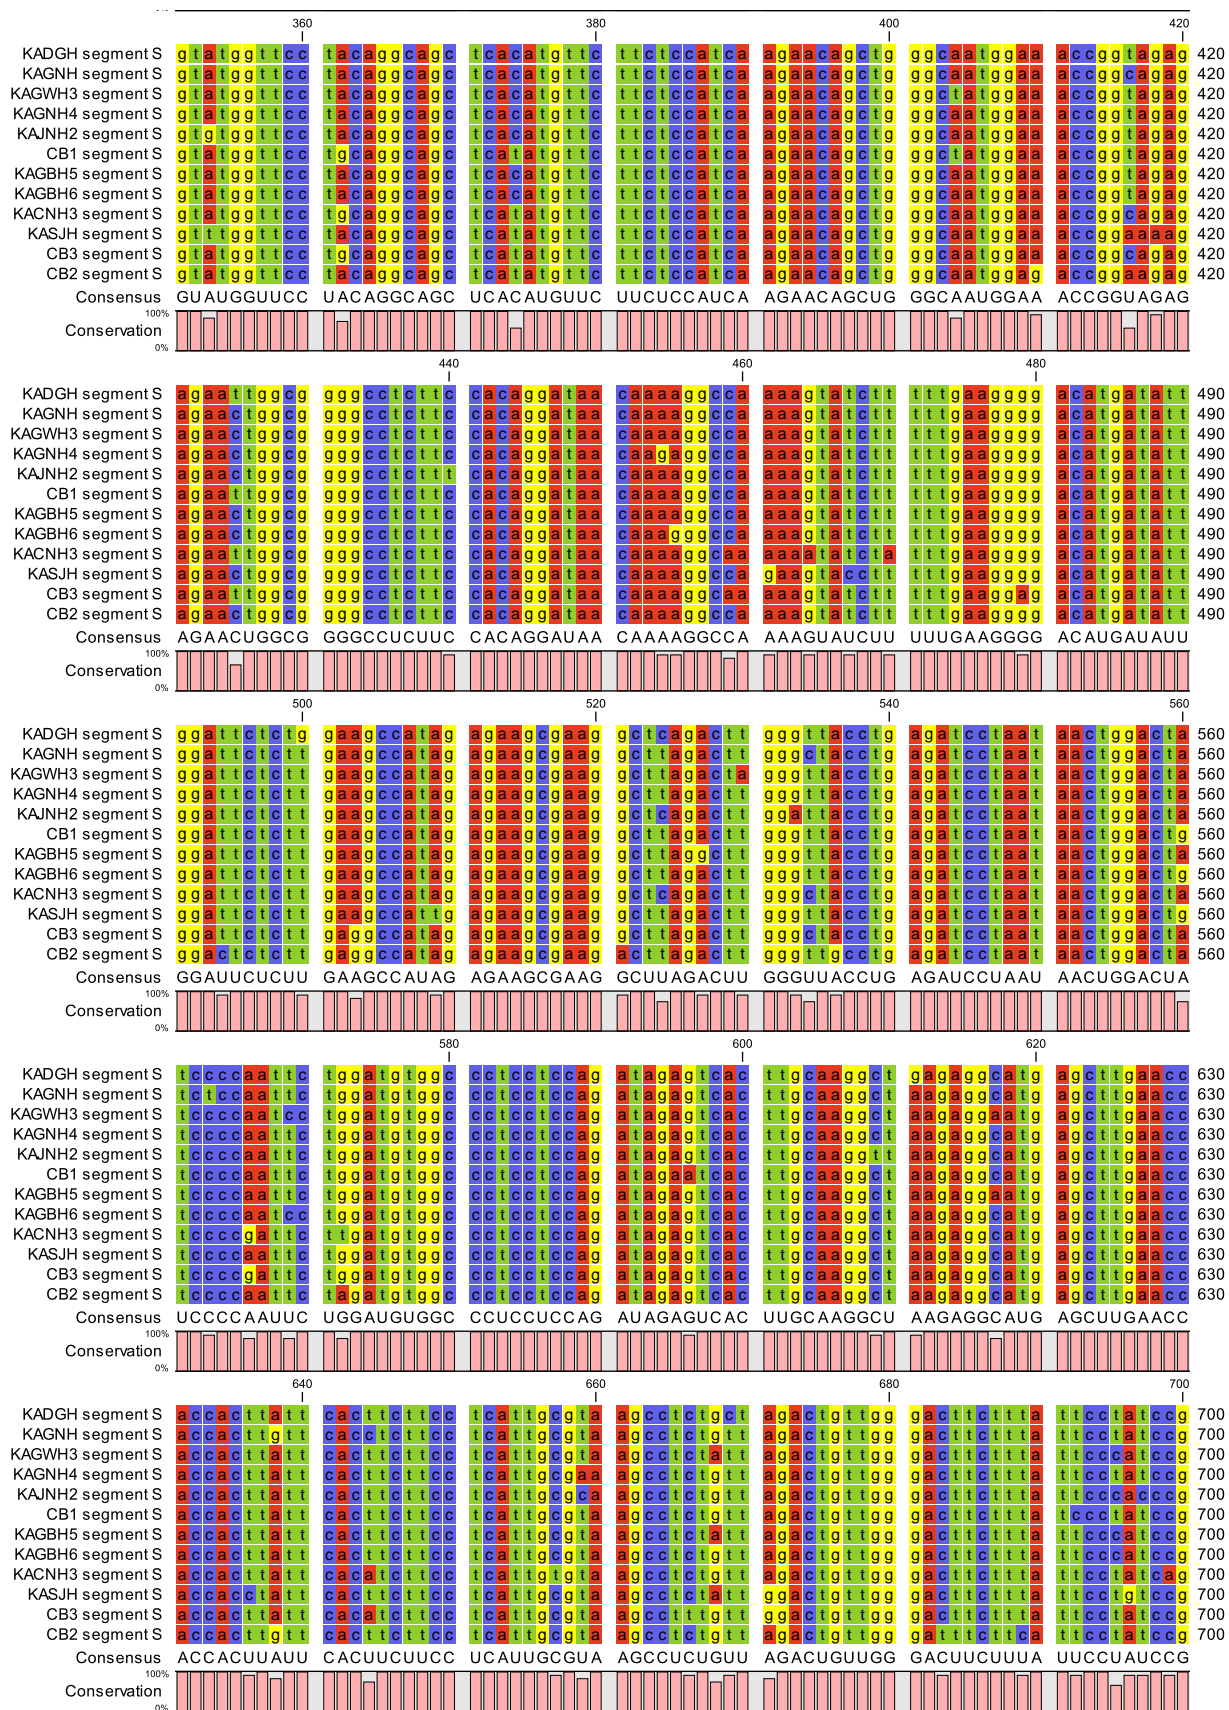

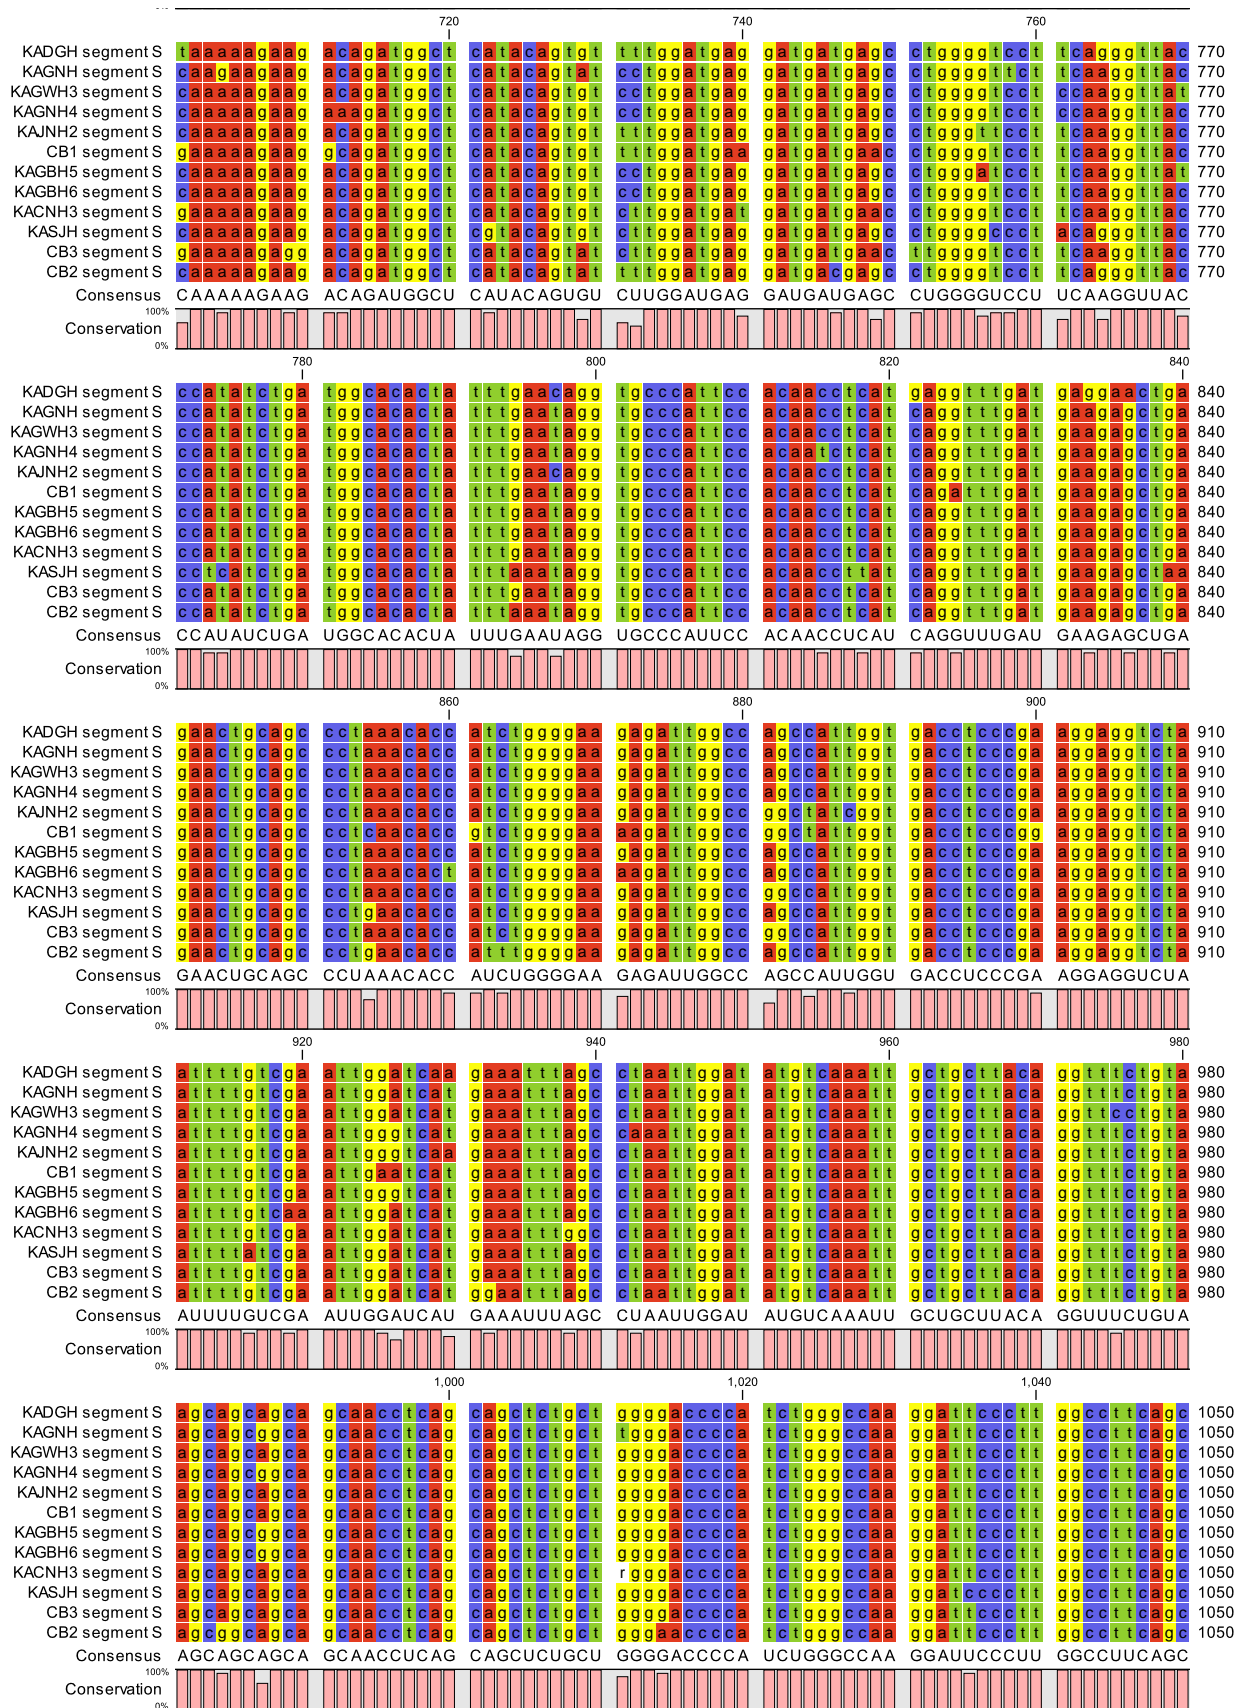

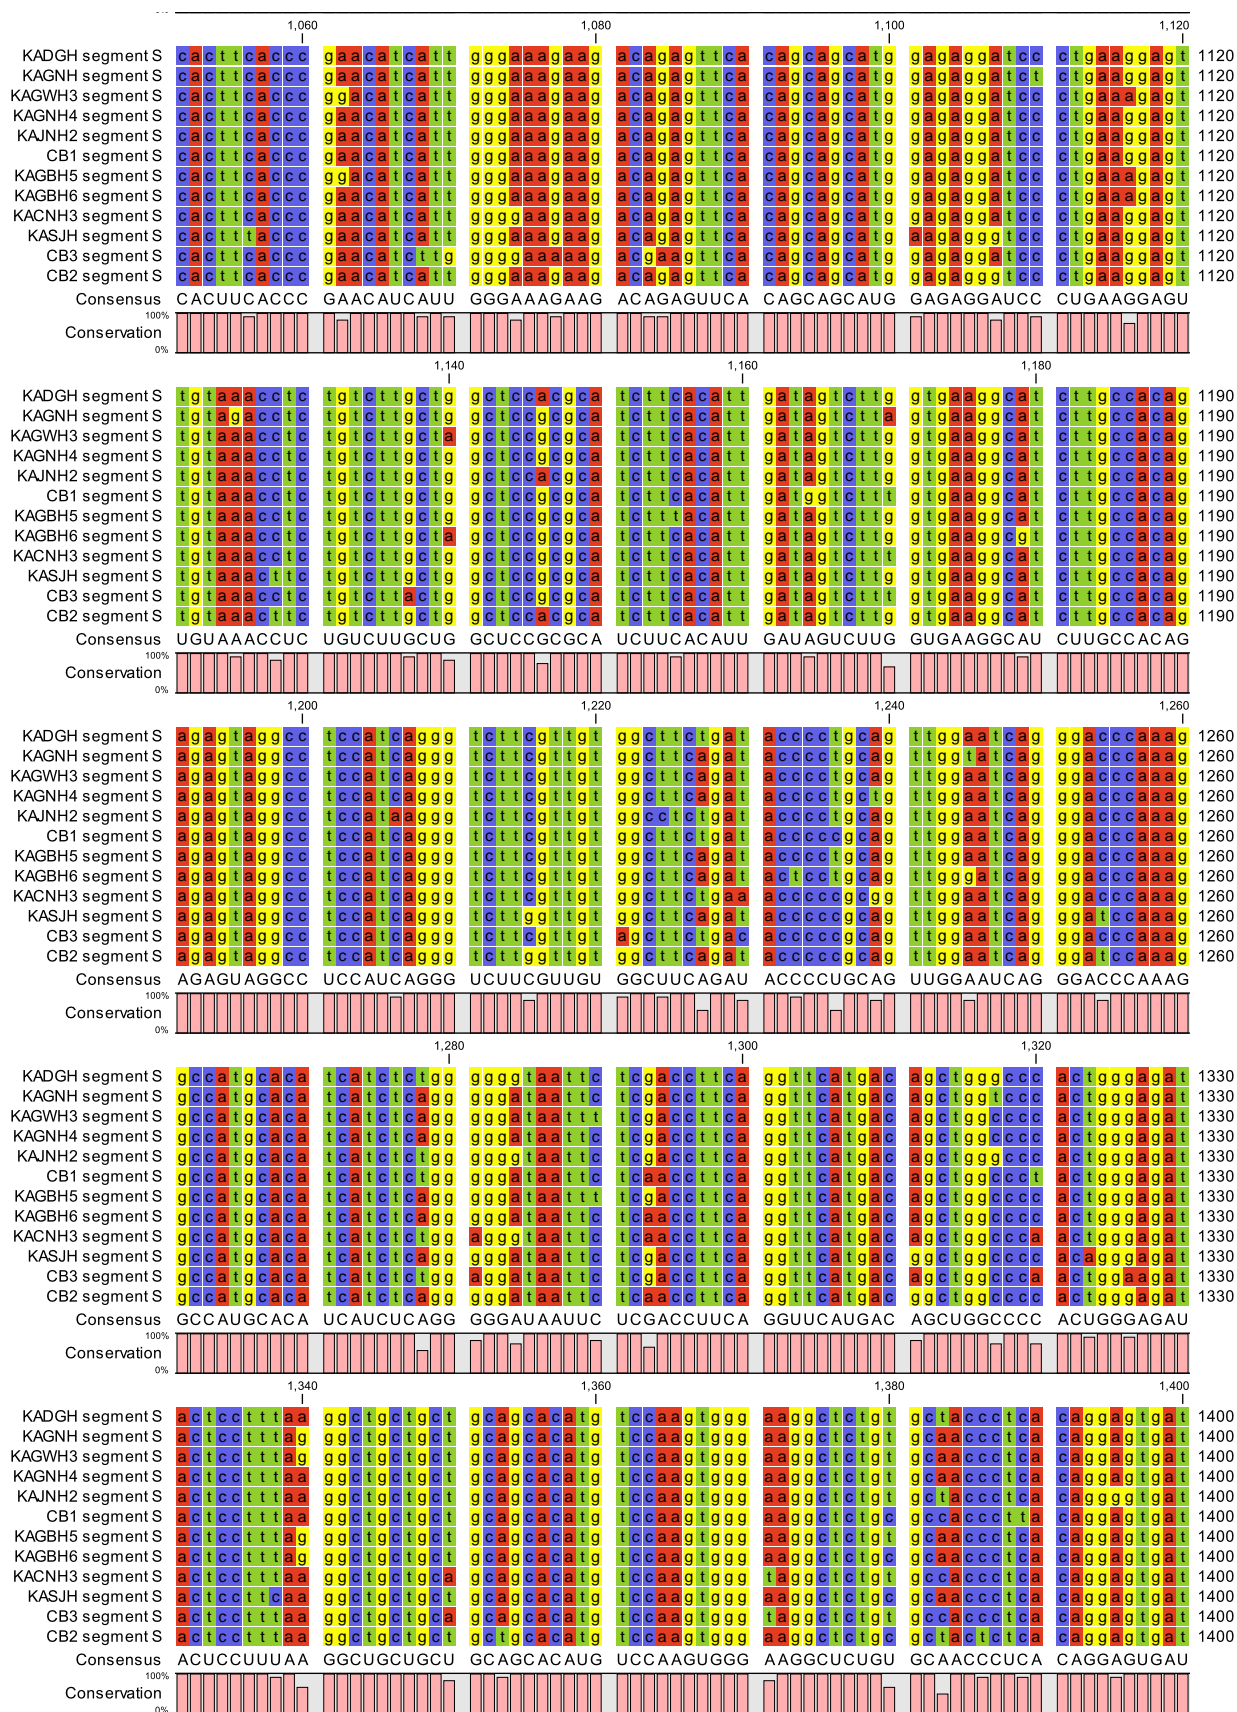

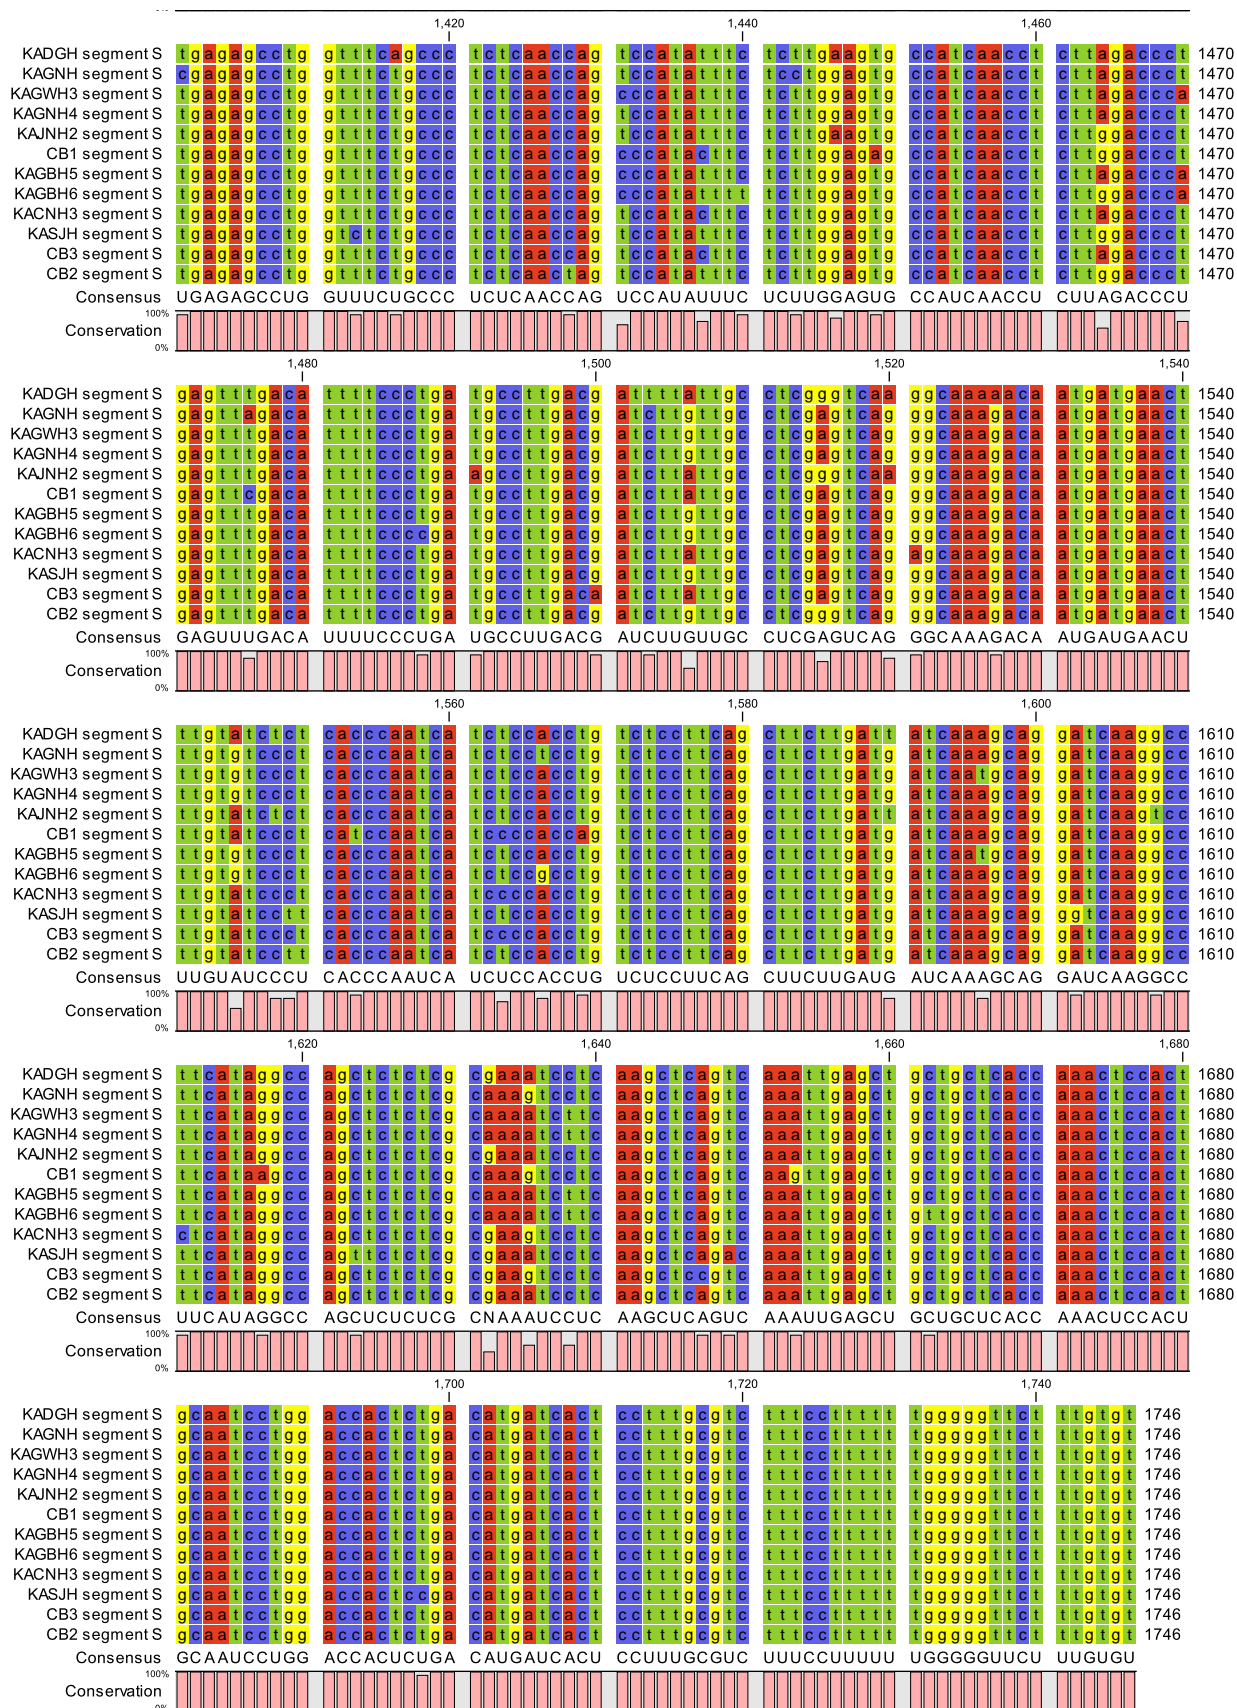

Supplement: s1 [file s1]
